# Supplementary material for: Oncogenic ETS fusions deregulate E2F3 target genes in Ewing sarcoma and prostate cancer
Source: HighWire-hosted journal article supplement (doi:10.1101/gr.151340.112), 2013-08-12
Supplement: Supplemental_Table1.xlsx [file Supplemental_Table1.xlsx]

## Sheet: Sheet1
	EWS/FLI1 in MSC	EWS/FLI1 in MSC	Primary Ewing sarcoma vs. MSC		Affymetrix probeset*
	(Riggi et al.) [15]	(Kovar lab unpubl.)	(Kauer et al.) [16]	HGU-133-PLUS2	HGU-133-A
E2F1	-0.01	0.33	0.24	204947_at	204947_at
E2F2	-0.16	0.21	0.01	228361_at	207042_at
E2F3	0.3	0.81	1.15	203692_s_at, 203693_s_at	203693_s_at
E2F4	0.08	0.18	0	202248_at	38707_r_at
E2F5	0.38	-0.18	0.3	221586_s_at	221586_s_at
E2F6	0.09	0.74	0.32	203957_at	203957_at
E2F7	0.2	2.85	-	228033_at
E2F8	-0.14	0.35	0.36	219990_at	219990_at
* for each dataset the probeset that showed the highest variance across all samples (irrespective of treatment labels) was chosen.
Affymetrix platforms: HGU-133-PLUS2 (Riggi et al. and unpubl. Kovar lab data:); HGU-133_A (Kauer et al.)
